# Supplementary material for: A novel all-fiber-based LiFePO4/Li4Ti5O12 battery with self-standing nanofiber membrane electrodes
Source: publisher site journal article supplement (doi:10.3762/bjnano.10.215), 2019-11-13
Supplement: Additional file 1 [file 2190-4286-10-215-S1.pdf]

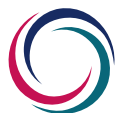

## Supporting Information

for

### **A novel all-fiber-based $\text{LiFePO}_4/\text{Li}_4\text{Ti}_5\text{O}_{12}$ battery with self-standing nanofiber membrane electrodes**

Li-li Chen, Hua Yang, Mao-xiang Jing, Chong Han, Fei Chen, Xin-yu Hu, Wei-yong Yuan, Shan-shan Yao and Xiang-qian Shen

*Beilstein J. Nanotechnol.* **2019**, *10*, 2229–2237. doi:10.3762/bjnano.10.215

## Additional experimental data

The obtained electrolyte membrane is shown in Figure S1a. The optimum thickness of the electrolyte membrane is 60–70  $\mu\text{m}$ . The prepared electrolyte membrane was then punched into a disk with a diameter of 18 mm (Figure S1b).

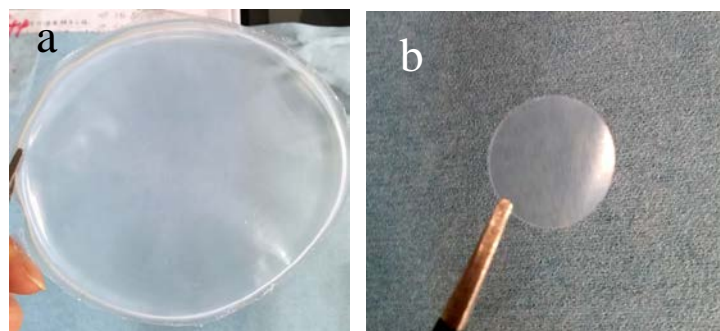

**Figure S1:** Pictures of the gel electrolyte.

Table S1 lists the electrochemical performance achieved in some related works. It can be seen that the flexible self-standing  $\text{LiFePO}_4/\text{C}$  fiber membrane cathode and  $\text{Li}_4\text{Ti}_5\text{O}_{12}/\text{C}$  fiber membrane anode in this work show a comparable electrochemical performance. In addition, the full all-fiber-based  $\text{LiFePO}_4/\text{Li}_4\text{Ti}_5\text{O}_{12}$  battery can be cycled at 1C for 800 times.

**Table S1:** Comparison between this work and related references.

| No. | components                                                                                                                                                                                                                              | method                               | performance                                                           | reference                                                                                        |
|-----|-----------------------------------------------------------------------------------------------------------------------------------------------------------------------------------------------------------------------------------------|--------------------------------------|-----------------------------------------------------------------------|--------------------------------------------------------------------------------------------------|
| 1   | LiFePO <sub>4</sub> /C short fibers                                                                                                                                                                                                     | electrospinning                      | 160 mAh/g at 0.06C<br>for 10 cycles                                   | <i>ACS Appl. Mater. Interf.</i> <b>2010</b> , 2, 212–218.<br>doi:10.1021/am900656y               |
| 2   | LiFePO <sub>4</sub> powder and LiFePO <sub>4</sub><br>nanofibers                                                                                                                                                                        | solid-state<br>blending              | 160 mAh/g at 0.1C<br>for 40 cycles                                    | <i>Ceram. Int.</i> <b>2015</b> , 41,<br>1963–1969.<br>doi:10.1016/j.ceramint.2014.08.120         |
| 3   | Li <sub>4</sub> Ti <sub>5</sub> O <sub>12</sub> /C short fibers                                                                                                                                                                         | hydrothermal<br>and ion-<br>exchange | 109 mAh/g at 20C<br>for 50 cycles                                     | <i>J. Alloys Compd.</i> <b>2017</b> ,<br>721, 545–553.<br>doi:10.1016/j.jallcom.2017.06.035      |
| 4   | carbon-coated Li <sub>4</sub> Ti <sub>5</sub> O <sub>12</sub> porous<br>fibers                                                                                                                                                          | sol–gel                              | 135 mAh/g at 5C<br>for 100 cycles                                     | <i>Electrochim. Acta</i> <b>2018</b> ,<br>283, 1418–1424.<br>doi:10.1016/j.electacta.2018.07.127 |
| 5   | Li <sub>3</sub> V <sub>2</sub> (PO <sub>4</sub> ) <sub>3</sub> /C short fibers                                                                                                                                                          | electrospinning                      | 103 mAh/g at 20C<br>for 120 cycles                                    | <i>Solid State Ionics</i> <b>2017</b> ,<br>305,36–42.<br>10.1016/j.ssi.2017.04.019               |
| 6   | LiMn <sub>2</sub> O <sub>4</sub> fibers elled PVdF-<br>HFP TiNb <sub>2</sub> O <sub>7</sub> fibers                                                                                                                                      | electrospinning                      | 116 mAh/g at 150<br>mA/g                                              | <i>ACS Appl. Mater. Interfaces</i> <b>2014</b> , 6, 8660–<br>8666.<br>doi:10.1021/am501464d      |
| 7   | LiFePO <sub>4</sub> /C fiber membrane<br>Li <sub>4</sub> Ti <sub>5</sub> O <sub>12</sub> /C fiber membrane<br>LiFePO <sub>4</sub> /C fiber membrane gelled<br>PVdF Li <sub>4</sub> Ti <sub>5</sub> O <sub>12</sub> /C fiber<br>membrane | electrospinning                      | 135 mAh/g at 1C<br>for 700 cycles<br>100mAh/g at 1C for<br>800 cycles | this work                                                                                        |

Figure S2 shows a photograph and SEM pictures of the  $\text{LiFePO}_4$  and  $\text{Li}_4\text{Ti}_5\text{O}_{12}$  fiber membrane electrodes after charge–discharge cycles. It can be seen that the composite electrodes still keep the 3D network structure after many cycles. This indicates that these fiber membranes possess a high structural stability during charge–discharge cycles.

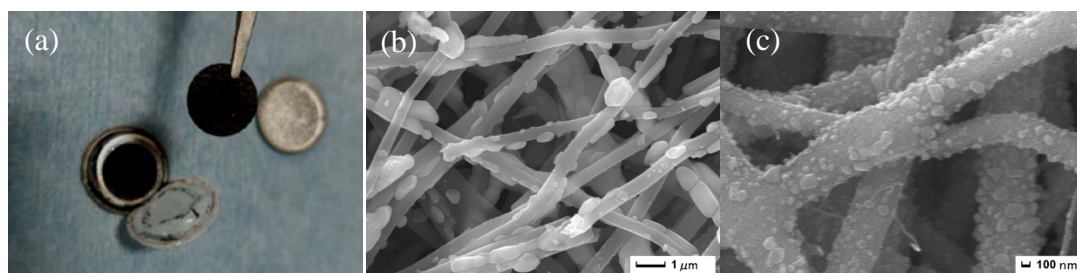

**Figure S2:** (a) Photograph and SEM pictures of (b) the  $\text{LiFePO}_4$  and (c) the  $\text{Li}_4\text{Ti}_5\text{O}_{12}$  fiber membrane electrode after 800 cycles.
